# Supplementary material
Source: PubMed Central journal article supplement (PMC3440208)
Supplement: supp_pp.112.197954_197954supplementall.pdf [file supp_pp.112.197954_197954supplementall.pdf]

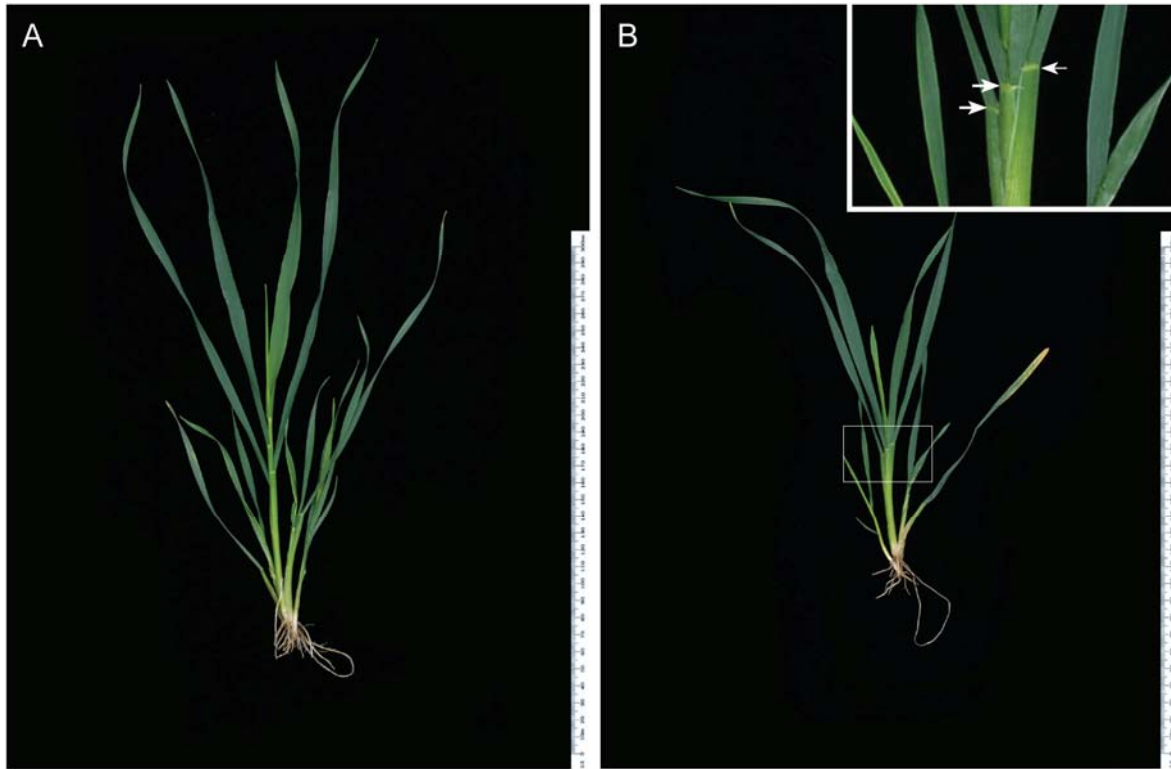

**Figure S1.** Normal (A) and stunted (B) *tin* plants of wheat. The stunted plant displays a rosette-like growth habit (indicated by arrow) with no distance between ligules of successively formed leaves. The stunted plant may recover and mature or die depending on the severity of the stunting. Arrows in (B) indicate the close position of ligules in the stunted plant.

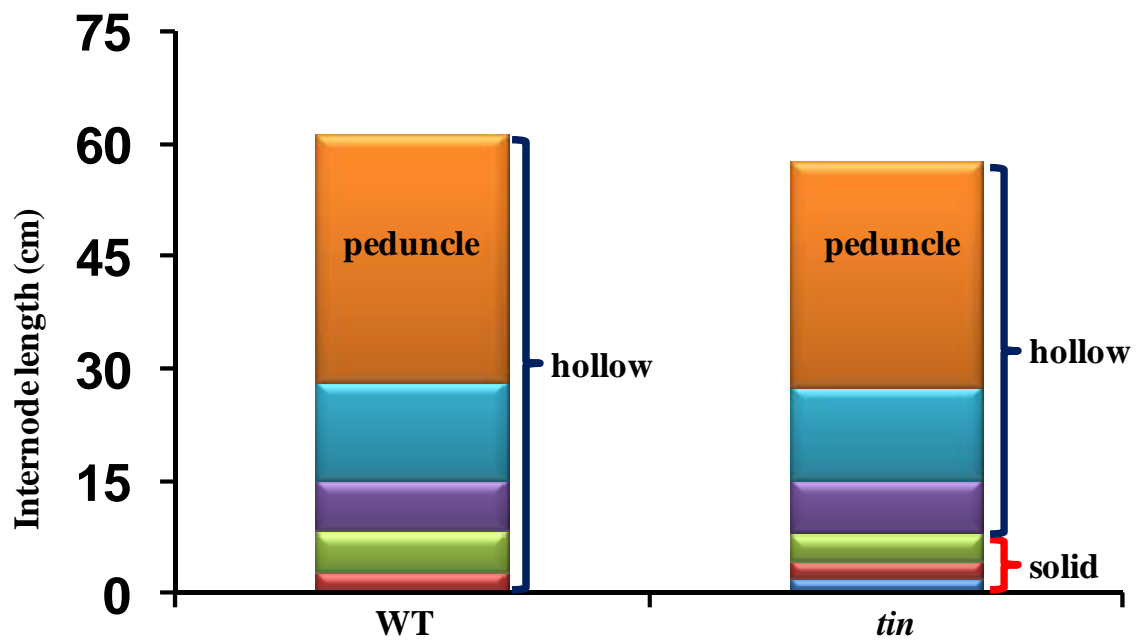

**Figure S2.** Mature stem internode length of WT and *tin*. The peduncle is the upper-most internode. In WT, all the internodes are hollow, while in *tin* the basal three internodes are solid.

**Supplemental Table 1.** Wheat ESTs, the accession number and primer sequences used for expression analysis

| Amino acid sequence used in tBlastn (accession #, species) | Predicted function                                                                                     | Wheat cDNA/EST accession # | Length (nt) | % identity (predicted amino acid sequences) | Remark                      | Forward / reverse primers for qPCR             |
|------------------------------------------------------------|--------------------------------------------------------------------------------------------------------|----------------------------|-------------|---------------------------------------------|-----------------------------|------------------------------------------------|
| AAB84193<br>pea                                            | Dormancy associated ( <i>DRM1</i> )                                                                    | DN828863                   | 684         | 54%                                         | EST includes the whole ORF  | CAACCTGGCCACCAAGAG/<br>CTCCTTGTCTCGTCTCGTC     |
| AAK60235<br>maize                                          | Inhibits bud outgrowth ( <i>Teosinte branched1, TB1</i> )                                              | BJ314006                   | 623         | 68%                                         | EST contains the TCP domain | GCTGCTCGATCGCTAGTACC/<br>ATGGCGATTACGACGAAGAC  |
| AAP37733<br>Arabidopsis                                    | Sugar-inducible (putative pyrophosphate-fructose-6-phosphate-1-phosphotransferase; glucose metabolism) | AK332443                   | 2286        | 76%                                         | Full length cDNA            | TTTTGTGGCCATAGAAACC/<br>CTGCCATAAAAGTGGGCAAT   |
| AAL31889<br>Arabidopsis                                    | Sugar starvation-inducible or dark-inducible (asparagine synthase 1 <i>ASN1</i> ; Nitrogen metabolism) | AK334107                   | 2006        | 81%                                         | Full length cDNA            | TTCGTCTTGCTCGATACACG/<br>CATACCGACCCATCAATTCC  |
| AAL83926<br>maize                                          | cell cycle ( <i>CycD2</i> )                                                                            | AF512432                   | 1645        | 75%                                         | EST                         | CTCCAGCAACATGCTACCAA/<br>ACACACCTGAAGCACAGCAC  |
| ACG31293<br>maize                                          | Cell cycle ( <i>His4</i> )                                                                             | CJ966253                   | 368         | 100%                                        | EST                         | ATCAACGACCACGAACCCTA/<br>CTTCCTCGAGAACGTTCATCC |
| NP_001105461<br>maize                                      | Cell cycle ( <i>PCNA</i> )                                                                             | CF182087                   | 706         | 93%                                         | EST                         | CGACATCATCACCATCAAGG/<br>TGTCCATGAGCTTCATCTCG  |
| BAE93883<br>rice                                           | Cell cycle ( <i>CDKB</i> )                                                                             | CD897467                   | 753         | 86%                                         | EST                         | CGGGATTTAAAGCCACAAAA/<br>CTCTGCTTAGCCCAAGATCG  |
